# Supplementary material for: Synthesis of manganese-based complex as cathode material for aqueous rechargeable batteries
Source: Royal Society of Chemistry journal article supplement (doi:10.1039/c8ra01982g), 2018-01-01
Supplement: c8ra01982g1.pdf [file c8ra01982g1.pdf]

## Electronic Supplementary Information

### **Facile synthesis of manganese-based complex as cathode materials for conductive-carbon-assisted aqueous rechargeable batteries**

Nan Qiu,<sup>\*</sup> Hong Chen, Zhaoming Yang, Sen Sun, Yuan Wang<sup>\*</sup>

Key Laboratory of Radiation Physics and Technology, Ministry of Education, Institute of Nuclear Science and Technology, Sichuan University, Chengdu 610064, People's Republic of China.

E-mail: [qiun@scu.edu.cn](mailto:qiun@scu.edu.cn), [wuyuan@scu.edu.cn](mailto:wuyuan@scu.edu.cn).

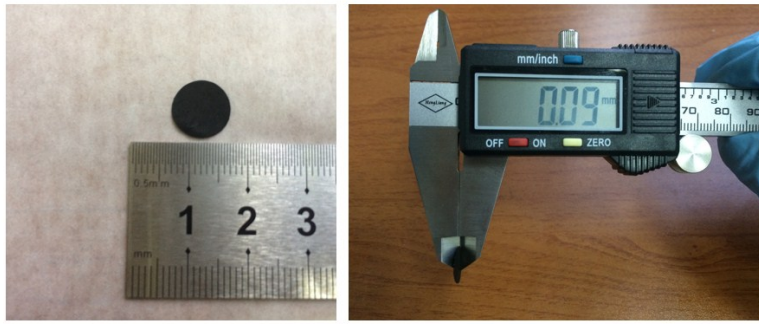

**Figure S1.** The photographs of the cathode film.

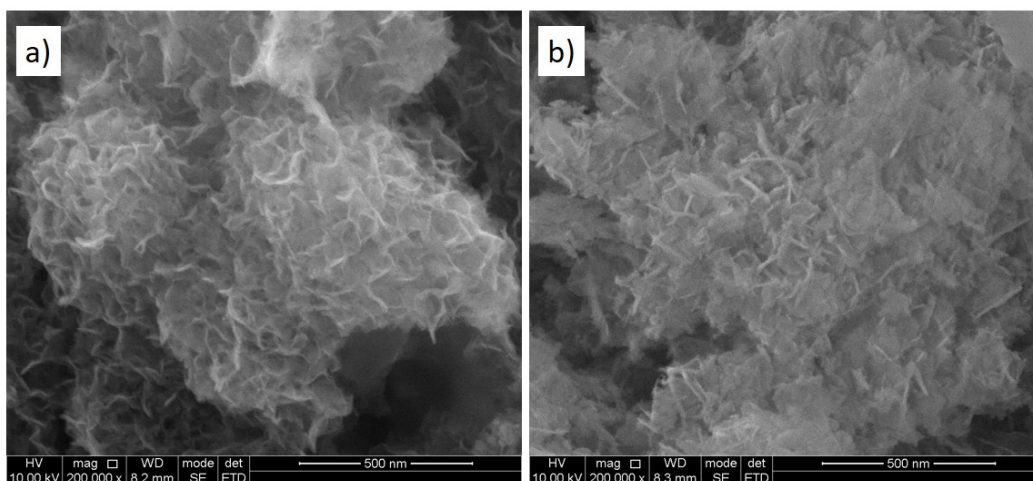

**Figure S2.** SEM images of cathode electrode in the charged/discharged state. a) 1.85V, charged state, b) 1V discharged state.

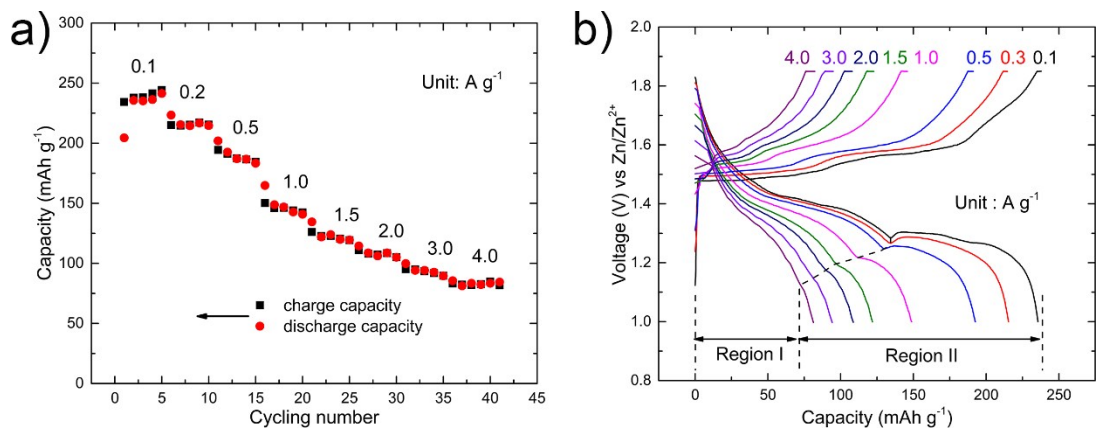

**Figure S3.** Electrochemical performance of manganese-based complex in 1M ZnSO<sub>4</sub>. a) Cycling performance at various current densities (0.1-4.0 A g<sup>-1</sup>). b) Charge and discharge voltage profiles using 1M ZnSO<sub>4</sub> as electrolyte at various current densities between 1.0-1.85 V vs. Zn/Zn<sup>2+</sup>

**Table S1.** Specific capacity and energy density of manganese-based complex.

|                                           |       |       |       |       |       |       |       |
|-------------------------------------------|-------|-------|-------|-------|-------|-------|-------|
| Current density (A g <sup>-1</sup> )      | 0.1   | 0.2   | 0.5   | 1.0   | 1.5   | 2.0   | 4.0   |
| Discharge capacity (mAh g <sup>-1</sup> ) | 248   | 231   | 196   | 175   | 160   | 149   | 131   |
| Energy density (Wh kg <sup>-1</sup> )     | 335.0 | 317.3 | 261.5 | 231.0 | 211.8 | 197.5 | 175.0 |

**Table S2.** Summary of electrochemical performance of different cathode materials for aqueous rechargeable batteries

| Samples                                             | Electrolyte                                                             | Energy density base on the active mass of electrode materials | Cycling performance                                                              | Reference number |
|-----------------------------------------------------|-------------------------------------------------------------------------|---------------------------------------------------------------|----------------------------------------------------------------------------------|------------------|
| LiMn <sub>2</sub> O <sub>4</sub>                    | 21M LiTFSI                                                              | ~200 Wh/kg at 24 mA/g                                         | ~40 mAh/g<br>68% with 1000 cycles at 540 mA/g and 78% with 100 cycles at 18 mA/g | 3                |
| LiMn <sub>2</sub> O <sub>4</sub>                    | 0.5 M Li <sub>2</sub> SO <sub>4</sub>                                   | ~75 Wh/kg at 500 mA/g                                         | ~120 mAh/g<br>100% capacity after 1200 cycles at 500 mA/g                        | 4                |
| LiMn <sub>2</sub> O <sub>4</sub>                    | 0.5 M Li <sub>2</sub> SO <sub>4</sub>                                   | ~100 Wh/kg at 500 mA/g                                        | 37 mAh/g<br>93% capacity retained after 10000 cycles at 1000 mA/g                | 5                |
| NaMnO <sub>2</sub>                                  | 2 M CH <sub>3</sub> COONa                                               | 30Wh/kg at 60 mA/g                                            | 37 mAh/g<br>75% capacity retained after 500 cycles at 300                        | 6                |
| Na <sub>0.95</sub> MnO <sub>2</sub>                 | 0.5M Zn(CH <sub>3</sub> COO) <sub>2</sub><br>0.5M CH <sub>3</sub> COONa | ~84 Wh/kg at 1C                                               | 40 mAh/g<br>92% capacity retained after 1000 cycles at 4C                        | 7                |
| Amorphous FePO <sub>4</sub>                         | 1M ZnSO <sub>4</sub>                                                    | --                                                            | 96mAh/g at 10 mA/g                                                               | 8                |
| ZnMn <sub>2</sub> O <sub>4</sub>                    | 3M Zn(CF <sub>3</sub> SO <sub>3</sub> ) <sub>2</sub>                    | ~202 Wh/kg at 50 mA/g                                         | ~90 mAh/g<br>94% capacity retained after 500 cycles at 500 mA/g                  | 2                |
| CuHCF                                               | 20mM ZnSO <sub>4</sub>                                                  | ~95Wh/kg at 60 mA/g                                           | ~55 mAh/g<br>96.3% capacity retained after 100 cycles at 60 mA/g                 | 9                |
| Zn <sub>3</sub> [Fe(CN) <sub>6</sub> ] <sub>2</sub> | 1M ZnSO <sub>4</sub>                                                    | 100 Wh/kg at 60 mA/g                                          | ~65 mAh/g<br>76% capacity retained after 100 cycles at 60 mA/g                   | 10               |

|                                                     |                                                |                                                 |                                                                                                                                          |           |
|-----------------------------------------------------|------------------------------------------------|-------------------------------------------------|------------------------------------------------------------------------------------------------------------------------------------------|-----------|
| $\alpha$ -MnO <sub>2</sub>                          | 1M ZnSO <sub>4</sub>                           | --                                              | 195 mAh/g<br>70% capacity retained after 30 cycles at 10 mA/g                                                                            | 11        |
| $\alpha$ -MnO <sub>2</sub>                          | 1M ZnSO <sub>4</sub>                           | ~315 Wh/kg at 32 mA/g                           | 100 mAh/g<br>100% capacity retained after 100 cycles at 380 mA/g                                                                         | 12        |
| $\delta$ -MnO <sub>2</sub>                          | 1M ZnSO <sub>4</sub>                           | --                                              | 252 mAh/g<br>44% capacity retained after 100 cycles at 83 mA/g                                                                           | 13        |
| $\alpha$ -MnO <sub>2</sub>                          | 1M ZnSO <sub>4</sub>                           | --                                              | 225 mAh/g<br>63% capacity retained after 50 cycles at 83 mA/g                                                                            | 14        |
| VS <sub>2</sub>                                     | 1M ZnSO <sub>4</sub>                           | 123 Wh/kg at 50 mA/g                            | 190.3 mAh/g<br>98% capacity retained after 200 cycles at 50 mA/g                                                                         | 15        |
| Na <sub>3</sub> MnTi(PO <sub>4</sub> ) <sub>3</sub> | 1M Na <sub>2</sub> SO <sub>4</sub>             | ~82 Wh/kg at 58.7 mA/g                          | 58.4 mAh/g<br>98% capacity retained after 100 cycles at 58.7 mA/g                                                                        | 16        |
| $\gamma$ -MnO <sub>2</sub> with TiB <sub>2</sub>    | 1M ZnSO <sub>4</sub><br>saturated LiOH         | --                                              | 220 mAh/g<br>55% capacity retained after 40 cycles at 0.5 mA/cm <sup>2</sup>                                                             | 17        |
| $\gamma$ -MnO <sub>2</sub> with TiS <sub>2</sub>    | 1M ZnSO <sub>4</sub><br>saturated LiOH         | --                                              | 148 mAh/g<br>50% capacity retained after 40 cycles at 0.5 mA/cm <sup>2</sup>                                                             | 18        |
| Manganese-based complex.                            | 1M ZnSO <sub>4</sub><br>0.1M MnSO <sub>4</sub> | 335 Wh/kg at 100 mA/g<br>175 Wh/kg at 4000 mA/g | 149 mAh/g<br>100% capacity retained after 500 cycles at 2000 mA/g<br>131 mAh/g<br>93.9% capacity retained after 2000 cycles at 4000 mA/g | This work |

## References

1. S. Guo, H. Yu, Z. Jian, P. Liu, Y. Zhu, X. Guo, M. Chen, M. Ishida and H. Zhou, *ChemSusChem*, 2014, **7**, 2115-2119.
2. N. Zhang, F. Cheng, Y. Liu, Q. Zhao, K. Lei, C. Chen, X. Liu and J. Chen, *J. Am. Chem. Soc.*, 2016, **138**, 12894-12901.
3. L. Suo, O. Borodin, T. Gao, M. Olguin, J. Ho, X. Fan, C. Luo, C. Wang and K. Xu, *Science*, 2015, **350**, 938-943.
4. W. Tang, Y. Hou, F. Wang, L. Liu, Y. Wu and K. Zhu, *Nano Lett.*, 2013, **13**, 2036-2040.
5. Q. Qu, L. Fu, X. Zhan, D. Samuelis, J. Maier, L. Li, S. Tian, Z. Li and Y. Wu, *Energy & Environmental Science*, 2011, **4**, 3985-3990.
6. Z. Hou, X. Li, J. Liang, Y. Zhu and Y. Qian, *Journal of Materials Chemistry A*, 2015, **3**, 1400-1404.

7. B. Zhang, Y. Liu, X. Wu, Y. Yang, Z. Chang, Z. Wen and Y. Wu, *Chem. Commun. (Cambridge, U. K.)*, 2014, **50**, 1209-1211.
8. V. Mathew, S. Kim, J. Kang, J. Gim, J. Song, J. P. Baboo, W. Park, D. Ahn, J. Han, L. Gu, Y. Wang, Y.-S. Hu, Y.-K. Sun and J. Kim, *NPG Asia Mater*, 2014, **6**, e138.
9. R. Trocoli and F. La Mantia, *ChemSusChem*, 2015, **8**, 481-485.
10. L. Y. Zhang, L. Chen, X. F. Zhou and Z. P. Liu, *Advanced Energy Materials*, 2015, **5**, 1400930.
11. B. Lee, H. R. Lee, H. Kim, K. Y. Chung, B. W. Cho and S. H. Oh, *Chem. Commun. (Cambridge, U. K.)*, 2015, **51**, 9265-9268.
12. C. Xu, B. Li, H. Du and F. Kang, *Angew. Chem., Int. Ed.*, 2012, **51**, 933-935.
13. M. H. Alfaruqi, J. Gim, S. Kim, J. Song, D. T. Pham, J. Jo, Z. Xiu, V. Mathew and J. Kim, *Electrochem. Commun.*, 2015, **60**, 121-125.
14. M. H. Alfaruqi, J. Gim, S. Kim, J. Song, J. Jo, S. Kim, V. Mathew and J. Kim, *J. Power Sources*, 2015, **288**, 320-327.
15. P. He, M. Yan, G. Zhang, R. Sun, L. Chen, Q. An and L. Mai, *Advanced Energy Materials*, 2017, 1601920.
16. H. Gao and J. B. Goodenough, *Angew. Chem., Int. Ed.*, 2016, **55**, 12768-12772.
17. M. Minakshi, D. R. G. Mitchell and K. Prince, *Solid State Ionics*, 2008, **179**, 355-361.
18. M. Minakshi, P. Singh, D. R. G. Mitchell, T. B. Issa and K. Prince, *Electrochim. Acta*, 2007, **52**, 7007-7013.
